# Supplementary material for: Efficacy and tolerance of brexucabtagene autoleucel in adults with R/R B-ALL: a GRAALL study from the DESCAR-T registry
Source: PubMed Central journal article supplement — Blood Adv. 2024 Aug 31;8(21):5493–6. doi: 10.1182/bloodadvances.2024013962 (PMC11532742; doi:10.1182/bloodadvances.2024013962), 2024-08-31

## Supplementary Appendix

### Efficacy and Tolerance of Brexucabtagene Autoleucel in Adults with Relapsed/Refractory B-cell Precursor Acute Lymphoblastic Leukemia: A GRAALL study from the DESCAR-T registry.

F. Rabian et al.

**Table S1. List of drugs used as bridging therapy**

| <b>Drug</b>               | <b>Number of patients</b> |
|---------------------------|---------------------------|
| Vincristine               | 32                        |
| Steroids                  | 26                        |
| Methotrexate              | 20                        |
| Cyclophosphamide          | 18                        |
| Cytarabine                | 15                        |
| Anthracycline             | 13                        |
| Etoposide                 | 9                         |
| 6-mercaptopurine          | 8                         |
| Asparaginase              | 8                         |
| Venetoclax                | 8                         |
| Tyrosine kinase inhibitor | 6                         |
| Other                     | 4                         |
| Clofarabine               | 2                         |
| Azacitidine               | 1                         |
| <b>Immunotherapy</b>      |                           |
| Inotuzumab ozogamicin     | 5                         |
| Blinatumomab              | 3                         |

**Figure S1. Overall survival from leukapheresis according to brexucel infusion success**

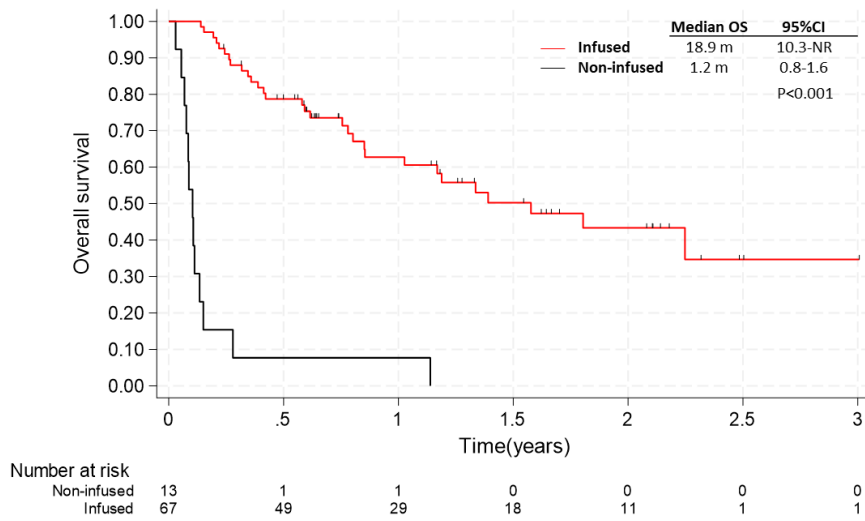

**Figure S2. Cumulative incidence of failure (CIF) and of treatment-related mortality (TRM) according to prior HSCT (A,B) and time from HSCT to apheresis (C,D).** CIF was defined as the time from infusion to brexu-cel failure or relapse considering TRM as a competitive event. TRM was defined as the time from infusion to death within the first month following brexu-cel infusion before evaluation or in continuous complete remission considering relapse as competing event. Subdistribution hazard ratios (SHR) from Fine-Gray model are given.

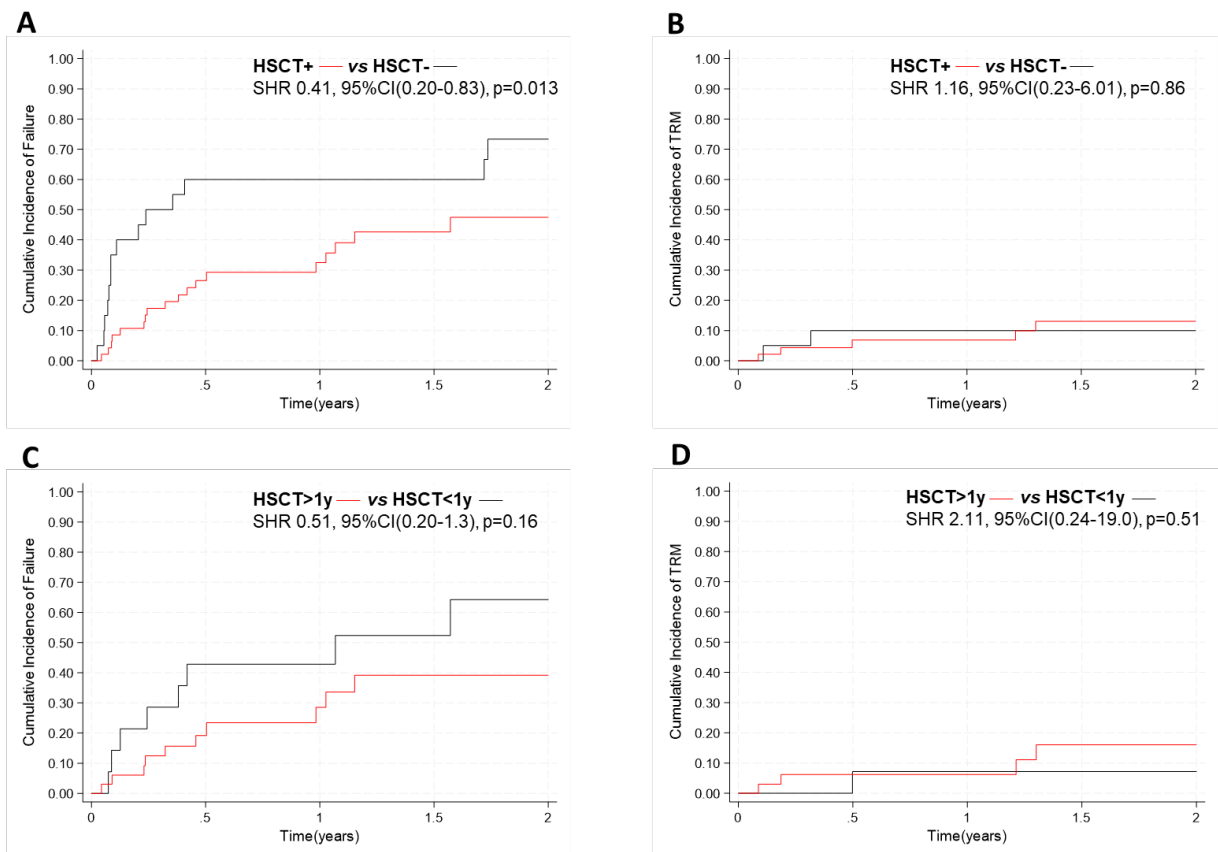

Supplement: BLOODA_ADV-2024-013962-mmc1.pdf [file BLOODA_ADV-2024-013962-mmc1.pdf]
